# Supplementary material for: Electronic Cigarette Use and Smoking Abstinence in Japan: A Cross-Sectional Study of Quitting Methods
Source: Int J Environ Res Public Health. 2017 Feb 17;14(2):202. doi: 10.3390/ijerph14020202 (PMC5334756; doi:10.3390/ijerph14020202)
Supplement: Supplementary file 1 [file ijerph-14-00202-s001.pdf]

# Supplementary Materials: Electronic Cigarette Use and Smoking Abstinence in Japan: A Cross-Sectional Study of Quitting Methods

Tomoyasu Hirano, Takahiro Tabuchi, Rika Nakahara, Naoki Kunugita and Yumiko Mochizuki-Kobayashi

## 1. Supplementary Methods

We conducted a sensitivity analysis on the span width of most recent smoking history. Of the 798 persons who smoked within the previous five years and had considered quitting at least once, the analyses consisted of 756 and 709 persons who smoked within the previous 4 and 3 years, respectively. They smoked within the previous 4 and 3 years and had considered quitting at least once within the previous 4 or 3 years, respectively.

## 2. Supplementary Results

Results of logistic regression models for smoking cessation among smokers within the previous 4 and 3 years are shown in Table S1. As in Table 2, showing smokers within the previous 5 years, e-cigarettes use was negatively associated with smoking cessation after adjustment for potential confounding factors (aOR = 0.598, 95% CI = 0.377–0.949, within 4 years; aOR = 0.638, 95% CI = 0.385–1.056, within 3 years). Statistical significance was diminished in an analysis using recent 3-year smokers, although this result might attributable to the small sample size of the smokers ( $n = 709$ ).

**Table S1.** Adjusted odds ratios (95% CIs) for smoking cessation within the previous 4 and 3 years, according to quitting methods and socio-demographic factors.

| Variable                                               | 4 Years<br>( $n = 756$ ) |             | 3 Years<br>( $n = 709$ ) |             |
|--------------------------------------------------------|--------------------------|-------------|--------------------------|-------------|
|                                                        | aOR                      | 95% CI      | aOR                      | 95% CI      |
| <b>Quitting methods conducted to date <sup>1</sup></b> |                          |             |                          |             |
| E-cigarette use                                        | 0.598                    | 0.377–0.949 | 0.638                    | 0.385–1.056 |
| Over-the-counter NRT                                   | 0.867                    | 0.568–1.322 | 0.890                    | 0.557–1.422 |
| Smoking cessation therapy for nicotine dependence      | -                        | -           | -                        | -           |
| Varenicline                                            | 1.929                    | 0.971–3.832 | 1.798                    | 0.847–3.818 |
| Others                                                 | 0.823                    | 0.380–1.783 | 0.916                    | 0.395–2.125 |
| Unassisted                                             | 1.471                    | 0.859–2.520 | 1.575                    | 0.867–2.861 |
| <b>Gender</b>                                          |                          |             |                          |             |
| Male (ref.)                                            | 1.000                    |             | 1.000                    |             |
| Female                                                 | 1.143                    | 0.792–1.648 | 1.049                    | 0.700–1.573 |
| <b>Age group (years)</b>                               |                          |             |                          |             |
| 20–29                                                  | 2.571                    | 1.453–4.550 | 2.592                    | 1.387–4.844 |
| 30–39                                                  | 1.761                    | 1.073–2.888 | 1.926                    | 1.123–3.304 |
| 40–49 (ref.)                                           | 1.000                    |             | 1.000                    |             |
| 50–59                                                  | 0.659                    | 0.381–1.138 | 0.658                    | 0.358–1.211 |
| 60–69                                                  | 1.547                    | 0.891–2.688 | 1.356                    | 0.729–2.519 |
| <b>Age smoking cigarettes started</b>                  |                          |             |                          |             |
| <20 years (ref.)                                       | 1.00                     |             | 1.000                    |             |
| ≥20 years                                              | 0.857                    | 0.590–1.245 | 0.788                    | 0.527–1.178 |

Table S1. Cont.

| Variable                   | 4 Years<br>(n = 756) |             | 3 Years<br>(n = 709) |             |
|----------------------------|----------------------|-------------|----------------------|-------------|
|                            | aOR                  | 95% CI      | aOR                  | 95% CI      |
| <b>Marriage</b>            |                      |             |                      |             |
| Married (ref.)             | 1.000                |             | 1.000                |             |
| Single                     | 0.539                | 0.352–0.828 | 0.538                | 0.337–0.860 |
| Widowed/divorced           | 0.325                | 0.159–0.665 | 0.348                | 0.159–0.762 |
| <b>History of disorder</b> |                      |             |                      |             |
| Cancer and/or CVD          | 0.651                | 0.300–1.409 | 0.812                | 0.359–1.835 |
| Hypertension               | 1.097                | 0.689–1.749 | 1.015                | 0.596–1.728 |
| Diabetes Mellitus          | 0.770                | 0.392–1.513 | 0.806                | 0.381–1.705 |

E-cigarettes: electronic cigarettes; NRT: nicotine replacement therapy; CVD: cardiovascular disease;

<sup>1</sup> aORs were analyzed compared with those who never conducted each method to quit, as references.

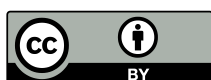

© 2017 by the authors; licensee MDPI, Basel, Switzerland. This article is an open access article distributed under the terms and conditions of the Creative Commons by Attribution (CC-BY) license (<http://creativecommons.org/licenses/by/4.0/>).
